# Supplementary material for: Good Samaritan Laws and Graduate Medical Education: A Tristate Survey
Source: PubMed Central journal article supplement — Mayo Clin Proc Innov Qual Outcomes. 2018 Sep 1;2(4):336–41. doi: 10.1016/j.mayocpiqo.2018.07.002 (PMC6260500; doi:10.1016/j.mayocpiqo.2018.07.002), 2018-09-01
Supplement: mmc1.pdf [file mmc1.pdf]

## **Supplemental Appendix 1.**

### **Survey cover letter**

#### **Protocol Title: Awareness of Good Samaritan Laws among Medical Trainees**

You are being asked to participate in a research study about the Awareness of Good Samaritan laws among medical trainees. The aim of this study is to find out the level of awareness of these laws among medical trainees and if there is a need for education regarding these laws during Medical school or Graduate Medical training.

If you agree to participate you will be asked to complete the attached survey which should take about 10-15 minutes. The questions are aimed to assess your level of comfort and confidence in the Good Samaritan laws. Optional questions are also included, aimed at eliciting demographic information. All the data collected will only be used for analysis and will not be used for the purposes of identification. You can choose to quit the survey at any time. You will not receive any payment for your participation.

There are no known risks to you from taking part in this research study.

The benefits which may reasonably be expected to result from this research study are improvement in medical and graduate medical education to fill the gaps in knowledge regarding the Good Samaritan laws if found.

Please understand your participation is voluntary and you have the right to withdraw your consent or discontinue participation at any time without penalty.

If you have any questions about this research study you can contact me at

XXXXXXXXXXXX@mayo.edu or on the phone number XXX-XXX-XXXX. If you have any

concerns, complaints, or general questions about research or your rights as a participant, please contact the Mayo Institutional Review Board (IRB) to speak to someone independent of the research team at XXX-XXX-XXXX or toll free at XXX-XXX-XXXX.

Please click on the following link (or copy and paste in your browser window) to complete the survey:

XXXXXXXXXXXXXXXXXXXXXXXXXXXXXXXXXXXXXXXXXXXXXXXXXXXXXXXXXXXXXXXXXXXX

Thank you in advance for your time.

## Supplemental appendix 2.

### Survey Questionnaire

Q1 Awareness of Good Samaritan Laws among Medical Trainees

Q2 Below is the United States definition of the Good Samaritan Law:

“Any person who in good faith renders emergency care, without remuneration or expectation of remuneration, at the scene of an accident or emergency to the victim of the accident or emergency shall not be liable for any civil damages resulting from the persons acts or omission, except for such damages as may result from the persons gross negligence or wanton acts or omissions. “

Examples of a Good Samaritan act are: Assisting the injured involved in a motor vehicle accident. Assisting with a medical emergency on a plane.

Q3 Have you ever been in a situation where there was a need for a medically trained person to respond? (This excludes any incident during your regular work hours or work place.)

- Yes
- No

Q4 If yes, how many times in the past 12 months have you been in a situation where there was a need for a medically trained person to respond?

- 0
- 1 to 2
- 3 to 4
- 5 to 6
- 7 or more

Q5 How many times in your lifetime (including the situations in the past 12 months) have you been in a situation where there was a need for a medically trained person to respond?

- 1 to 2
- 3 to 4
- 5 to 6
- 7 or more

Q6 Which of the following factors would increase the likelihood of you assisting in a situation where there is a need for a medically trained person to respond?

- Confidence in your medical knowledge
- Confidence in your medico-legal knowledge
- Both equally
- Other, please specify: \_\_\_\_\_

Q7 How comfortable or uncomfortable are you regarding your knowledge of Good Samaritan Laws?

- Very comfortable
- Somewhat comfortable
- Neither comfortable nor uncomfortable
- Somewhat uncomfortable
- Not at all comfortable

Q8 How confident or not confident are you about Good Samaritan Laws protecting Good Samaritan acts that you may perform (even if you are not aware of the relevant laws)?

- Very confident
- Somewhat confident
- Neither confident nor not confident
- Somewhat not confident
- Not at all confident

Q9 Do you think that awareness of Good Samaritan Laws are essential for a medical professional (eg, MD's, DO's, and equivalents)?

- Yes
- No

Q10 Do you think there is a need for education to increase knowledge about Good Samaritan Laws during the training of a medical professional?

- Yes
- No

Q11 When do you think training regarding Good Samaritan Laws would be most appropriate?

- During medical school
- During residency
- Other, please specify: \_\_\_\_\_

Q12 What medium would you prefer for education regarding Good Samaritan Laws? (Mark all that apply.)

- Prefer no education
- Didactics
- Interactive workshops
- Printed material
- Journals
- Online modules
- Case studies
- Other, please specify: \_\_\_\_\_

Q13 Demographics (Optional) This information will be used only to analyze results and will not be used to identify any individual.

Q14 What is your gender?

- Male
- Female

Q15 Please indicate your age.

- 25 or younger
- 26 to 30
- 31 to 35
- 36 to 40
- 41 to 45
- 46 or older

Q16 From the options listed below, please choose one that most accurately describes the specialty you are currently training in.

- Anesthesiology
- Dental Specialties
- Dermatology
- Emergency Medicine
- Family Medicine
- Genetics
- Internal Medicine and Subspecialties
- Neurologic Surgery
- Neurology
- Obstetrics and Gynecology
- Ophthalmology
- Orthopedic Surgery
- Otolaryngology
- Pathology and Laboratory Medicine
- Pediatric and Adolescent Medicine
- Physical Medicine and Rehabilitation
- Preventive Medicine
- Psychiatry
- Psychology, Post PhD
- Radiation Oncology
- Radiology
- Speech Pathology, Post PhD
- Sports Medicine
- Surgery Specialties
- Transitional year
- Urology
- Other, please specify: \_\_\_\_\_

Q17 What is your post graduate year?

- PGY-1
- PGY-2
- PGY-3
- PGY-4
- PGY-5
- PGY-6
- PGY-7
- Other, please specify: \_\_\_\_\_

Q18 Have you taken any undergraduate or post graduate course in the field of law?

- Yes
- No

Q19 If answer to Q 18. Yes, please specify the name of the course or the field of law it dealt with.

Q20 Before receiving the survey, have you ever specifically looked up Good Samaritan Laws?

- Yes
- No

Q21 On a scale of 0 to 10, with 0 being "No concern" and 10 being "Very concerned," please rate your level of concern regarding litigation arising out of a Good Samaritan act performed by you.

- No concern 0
- 1
- 2
- 3
- 4
- 5
- 6
- 7
- 8
- 9
- Very concerned 10

Q22 How often do you carry your medical license (or a copy of it) with you?

- All the time
- Most of the time
- Some of the time
- Rarely
- Never

Q23 Will you research Good Samaritan Laws once you finish this survey?

- Yes
- No
- Maybe

Q24 Do you have further thoughts, opinions, comments, or suggestions regarding this topic?

X-X-X
